# Supplementary material
Source: publisher site journal article supplement (https://www.dovepress.com/article/603390)
Supplement: Supplementary file 1 [file 603390%20Supplementary%20Figures%201-2.docx]

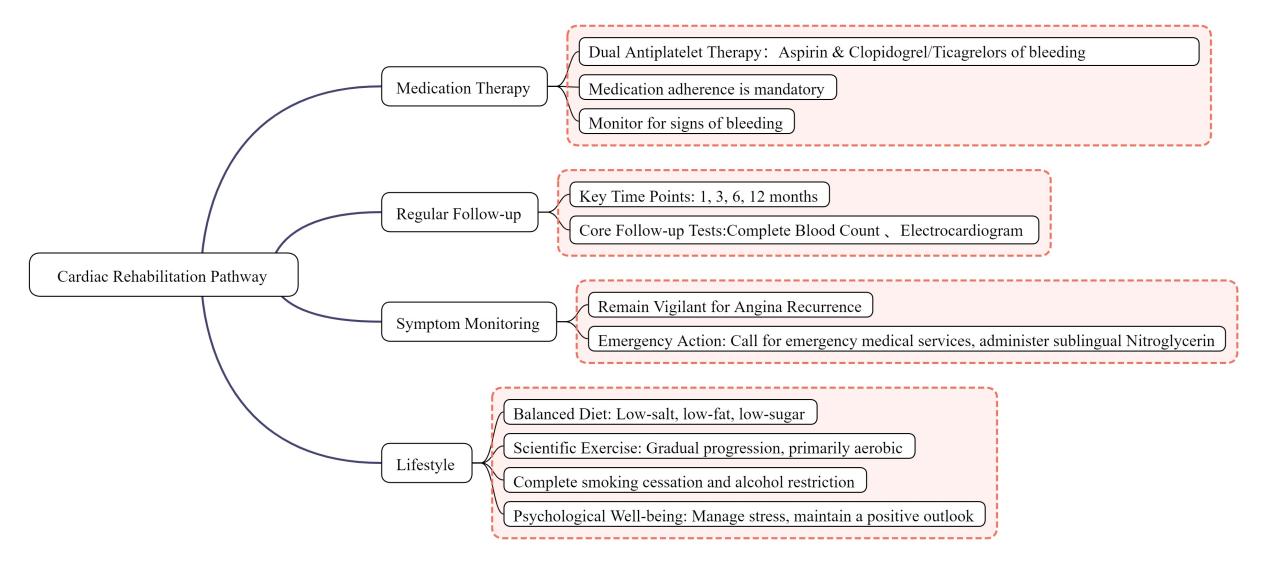


Figure S1 Visualized mind map for percutaneous coronary intervention (PCI) postoperative health education.


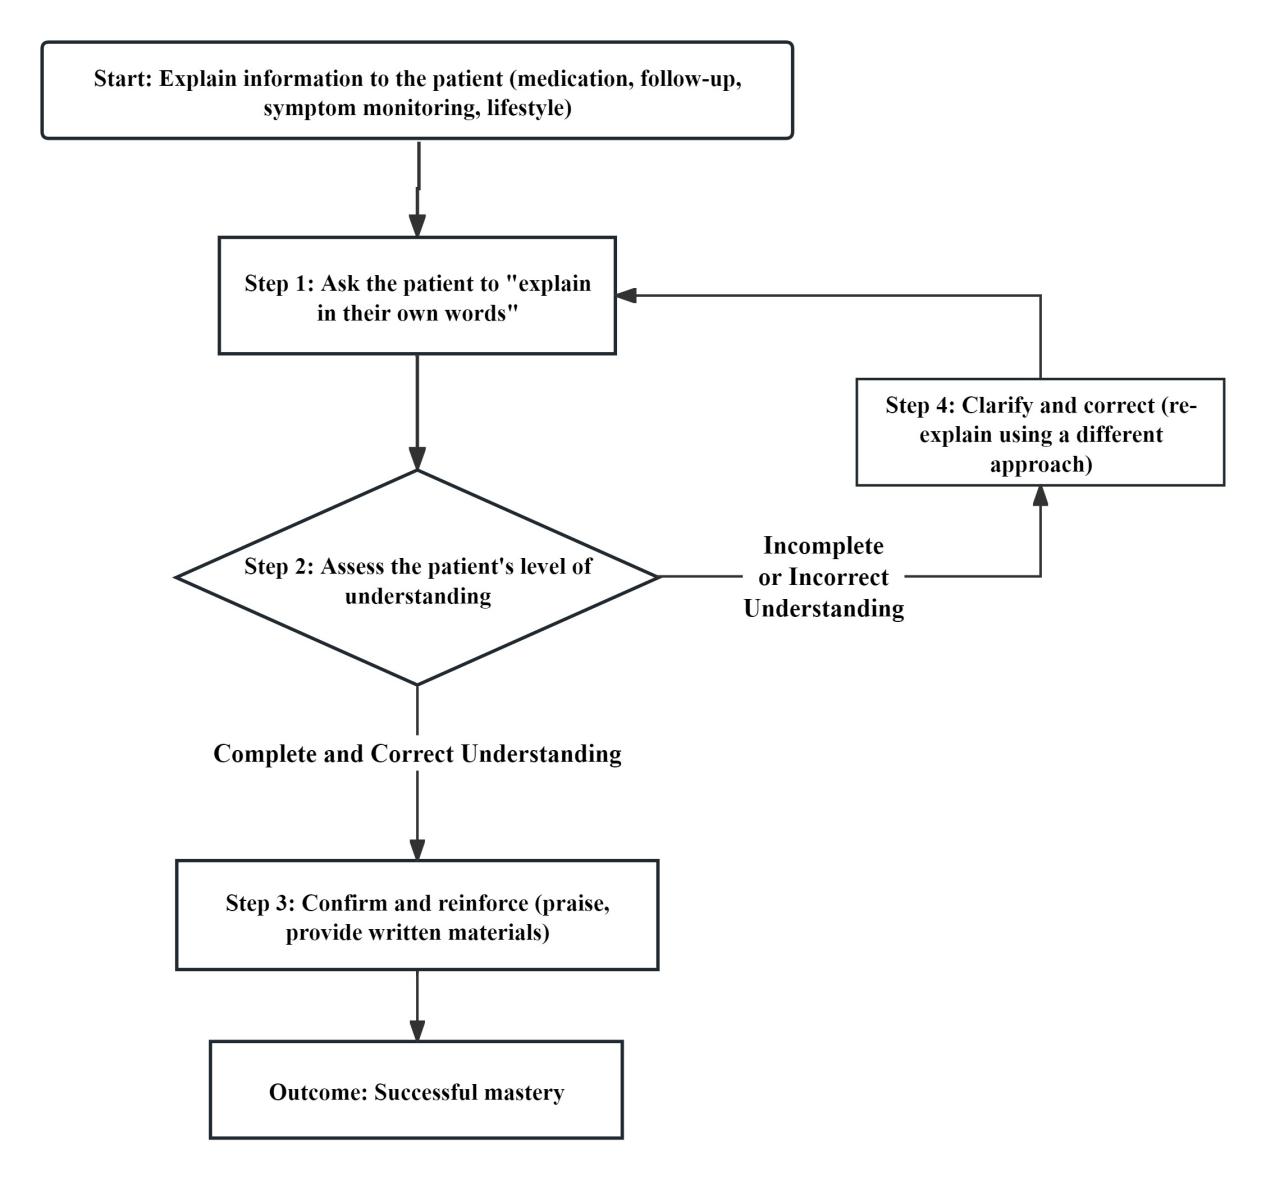


Figure S2. Implementation flowchart of the teach-back method in PCI postoperative health education.
